# Supplementary material for: The Anti-Inflammatory Effect of a Combination of Five Compounds From Five Chinese Herbal Medicines Used in the Treatment of COPD
Source: Front Pharmacol. 2021 Oct 27;12:709702. doi: 10.3389/fphar.2021.709702 (PMC8578279; doi:10.3389/fphar.2021.709702)
Supplement: Supplementary file 1 [file Table2.XLSX]

## Sheet: Sheet1
	Suppl. Table 2 COPD genes in 4 public databases
	'Gene symbol'	frequency'	CTD'	'GeneCard'	'DisGeNET'	'DEF_gene'
	'BNIP3'	4	1	1	1	1
	'CAV1'	4	1	1	1	1
	'CDKN1C'	4	1	1	1	1
	'CIRBP'	4	1	1	1	1
	'COL4A3'	4	1	1	1	1
	'CST3'	4	1	1	1	1
	'CXCL8'	4	1	1	1	1
	'CYP1B1'	4	1	1	1	1
	'FOSL1'	4	1	1	1	1
	'GSTP1'	4	1	1	1	1
	'HAS2'	4	1	1	1	1
	'IL10'	4	1	1	1	1
	'IL1B'	4	1	1	1	1
	'IL2RA'	4	1	1	1	1
	'IL6'	4	1	1	1	1
	'LGALS3'	4	1	1	1	1
	'LIF'	4	1	1	1	1
	'LTC4S'	4	1	1	1	1
	'NFATC3'	4	1	1	1	1
	'NKX2-1'	4	1	1	1	1
	'NLRP3'	4	1	1	1	1
	'NR4A3'	4	1	1	1	1
	'PTX3'	4	1	1	1	1
	'RRM1'	4	1	1	1	1
	'S100A4'	4	1	1	1	1
	'SERPINE1'	4	1	1	1	1
	'SFTPD'	4	1	1	1	1
	'SNAI1'	4	1	1	1	1
	'SOCS3'	4	1	1	1	1
	'SPP1'	4	1	1	1	1
	'TMEM219'	4	1	1	1	1
	'TNFRSF9'	4	1	1	1	1
	'A2M'	3	1	1	1	0
	'ABCA1'	3	1	1	1	0
	'ABCA4'	3	1	1	1	0
	'ABCB1'	3	1	1	1	0
	'ABCC1'	3	1	1	1	0
	'ABHD2'	3	1	1	1	0
	'ABLIM2'	3	1	1	1	0
	'ACADVL'	3	1	1	0	1
	'ACE'	3	1	1	1	0
	'ACHE'	3	1	1	1	0
	'ACP3'	3	1	1	1	0
	'ACTB'	3	1	1	1	0
	'ACTG1'	3	1	1	1	0
	'ACTG2'	3	1	1	1	0
	'ADA'	3	1	1	1	0
	'ADAM17'	3	1	1	1	0
	'ADAM19'	3	1	1	1	0
	'ADAM33'	3	1	1	1	0
	'ADAM8'	3	1	1	1	0
	'ADAM9'	3	1	1	1	0
	'ADAMTS13'	3	1	1	1	0
	'ADAMTS4'	3	1	1	0	1
	'ADAMTSL3'	3	1	1	1	0
	'ADCY2'	3	1	1	1	0
	'ADCY5'	3	1	1	1	0
	'ADGRG6'	3	1	1	1	0
	'ADGRV1'	3	1	1	1	0
	'ADIPOQ'	3	1	1	1	0
	'ADIPOR1'	3	1	1	1	0
	'ADIPOR2'	3	1	1	1	0
	'ADM'	3	1	1	1	0
	'ADORA2A'	3	1	1	1	0
	'ADORA2B'	3	1	1	1	0
	'ADRB1'	3	1	1	1	0
	'ADRB2'	3	1	1	1	0
	'AFAP1L2'	3	1	1	1	0
	'AGER'	3	1	1	1	0
	'AGT'	3	1	1	1	0
	'AGTR1'	3	1	1	0	1
	'AHCY'	3	1	1	1	0
	'AHR'	3	1	1	1	0
	'AHSG'	3	1	1	1	0
	'AIM2'	3	1	1	1	0
	'AIMP2'	3	1	1	1	0
	'AKAP12'	3	1	1	1	0
	'AKAP5'	3	1	1	1	0
	'AKT1'	3	1	1	1	0
	'ALB'	3	1	1	1	0
	'ALDH2'	3	1	1	1	0
	'ALK'	3	1	1	1	0
	'ALOX15'	3	1	1	1	0
	'ALPI'	3	1	1	1	0
	'ALPP'	3	1	1	1	0
	'AMOTL1'	3	1	1	1	0
	'AMZ1'	3	1	1	1	0
	'ANGPT1'	3	1	1	1	0
	'ANGPT2'	3	1	1	1	0
	'ANKRD49'	3	1	1	0	1
	'ANO1'	3	1	1	1	0
	'ANPEP'	3	1	1	1	0
	'ANXA1'	3	1	1	1	0
	'ANXA11'	3	1	1	1	0
	'ANXA5'	3	1	1	1	0
	'AOC3'	3	1	1	1	0
	'APEX1'	3	1	1	1	0
	'APOA1'	3	1	1	1	0
	'APOM'	3	1	1	1	0
	'APP'	3	1	1	1	0
	'AQP4'	3	1	1	1	0
	'AQP5'	3	1	1	1	0
	'AREG'	3	1	1	1	0
	'ARHGAP42'	3	1	1	1	0
	'ARHGEF38'	3	1	1	1	0
	'ARMC2'	3	1	1	1	0
	'ARMCX2'	3	1	1	0	1
	'ARSA'	3	1	1	1	0
	'ARSB'	3	1	1	1	0
	'ARVCF'	3	1	1	1	0
	'ASAP1'	3	1	1	1	0
	'ASAP2'	3	1	1	1	0
	'ASTN2'	3	1	1	1	0
	'ATF3'	3	1	1	1	0
	'ATF4'	3	1	1	1	0
	'ATG16L1'	3	1	1	1	0
	'ATG7'	3	1	1	1	0
	'ATP2A2'	3	1	1	1	0
	'ATP2C2'	3	1	1	1	0
	'ATP5F1B'	3	1	1	0	1
	'ATP6V1D'	3	1	1	1	0
	'ATXN7L1'	3	1	1	1	0
	'BAMBI'	3	1	1	1	0
	'BAX'	3	1	1	1	0
	'BCAS3'	3	1	1	1	0
	'BCHE'	3	1	1	1	0
	'BCL2'	3	1	1	1	0
	'BDNF'	3	1	1	1	0
	'BECN1'	3	1	1	1	0
	'BICD1'	3	1	1	1	0
	'BID'	3	1	1	1	0
	'BMP4'	3	1	1	1	0
	'BMP6'	3	1	1	1	0
	'BMP8A'	3	1	1	1	0
	'BMPR1A'	3	1	1	1	0
	'BMPR2'	3	1	1	1	0
	'BNC2'	3	1	1	1	0
	'BPI'	3	1	1	1	0
	'BPIFA1'	3	1	1	1	0
	'BPIFB1'	3	1	1	1	0
	'BRD4'	3	1	1	1	0
	'BSG'	3	1	1	1	0
	'BTBD1'	3	1	1	1	0
	'BTBD11'	3	1	1	1	0
	'BTBD9'	3	1	1	1	0
	'BTC'	3	1	1	1	0
	'C1GALT1'	3	1	1	1	0
	'C3AR1'	3	1	1	1	0
	'C4A'	3	1	1	1	0
	'C4BPB'	3	1	1	1	0
	'C5AR1'	3	1	1	1	0
	'CA2'	3	1	1	1	0
	'CALCA'	3	1	1	1	0
	'CALCR'	3	1	1	1	0
	'CALR'	3	1	1	1	0
	'CAMK1D'	3	1	1	1	0
	'CAMP'	3	1	1	1	0
	'CAP1'	3	1	1	1	0
	'CASC15'	3	1	1	1	0
	'CASP1'	3	1	1	1	0
	'CASP3'	3	1	1	1	0
	'CASP4'	3	1	1	1	0
	'CASP8'	3	1	1	1	0
	'CASZ1'	3	1	1	1	0
	'CAT'	3	1	1	1	0
	'CAV2'	3	1	1	0	1
	'CBS'	3	1	1	1	0
	'CCDC69'	3	1	1	1	0
	'CCDC91'	3	1	1	1	0
	'CCL1'	3	1	1	1	0
	'CCL11'	3	1	1	1	0
	'CCL13'	3	1	1	1	0
	'CCL18'	3	1	1	1	0
	'CCL2'	3	1	1	1	0
	'CCL20'	3	1	1	1	0
	'CCL22'	3	1	1	1	0
	'CCL24'	3	1	1	1	0
	'CCL28'	3	1	1	1	0
	'CCL3'	3	1	1	1	0
	'CCL5'	3	1	1	1	0
	'CCN1'	3	1	1	1	0
	'CCN2'	3	1	1	1	0
	'CCND1'	3	1	1	1	0
	'CCNE1'	3	1	1	1	0
	'CCNL2'	3	1	0	1	1
	'CCR2'	3	1	1	1	0
	'CCR3'	3	1	1	0	1
	'CCR5'	3	1	1	1	0
	'CCR6'	3	1	1	1	0
	'CCR7'	3	1	1	1	0
	'CCR8'	3	1	1	1	0
	'CD14'	3	1	1	1	0
	'CD163'	3	1	1	1	0
	'CD1A'	3	1	1	1	0
	'CD1D'	3	1	1	1	0
	'CD200'	3	1	1	1	0
	'CD207'	3	1	1	1	0
	'CD274'	3	1	1	1	0
	'CD28'	3	1	1	1	0
	'CD33'	3	1	1	1	0
	'CD34'	3	1	1	1	0
	'CD38'	3	1	1	1	0
	'CD40'	3	1	1	1	0
	'CD63'	3	1	1	1	0
	'CD68'	3	1	1	1	0
	'CD69'	3	1	1	1	0
	'CD74'	3	1	1	1	0
	'CD80'	3	1	1	1	0
	'CD81'	3	1	1	1	0
	'CD83'	3	1	1	1	0
	'CD86'	3	1	1	1	0
	'CD8A'	3	1	1	1	0
	'CD96'	3	1	1	1	0
	'CDC123'	3	1	1	1	0
	'CDC6'	3	1	1	1	0
	'CDH11'	3	1	1	1	0
	'CDH13'	3	1	1	1	0
	'CDH3'	3	1	1	1	0
	'CDK6'	3	1	1	1	0
	'CDK7'	3	1	1	0	1
	'CDKN1B'	3	1	1	1	0
	'CDKN2A'	3	1	1	1	0
	'CDKN2B-AS1'	3	1	1	1	0
	'CDO1'	3	1	1	0	1
	'CDX2'	3	1	1	1	0
	'CDYL'	3	1	1	1	0
	'CEACAM5'	3	1	1	1	0
	'CELSR1'	3	1	1	1	0
	'CEP70'	3	1	1	1	0
	'CES2'	3	1	1	1	0
	'CFAP221'	3	1	1	1	0
	'CFDP1'	3	1	1	1	0
	'CFH'	3	1	1	1	0
	'CFLAR'	3	1	1	1	0
	'CFTR'	3	1	1	1	0
	'CHI3L1'	3	1	1	1	0
	'CHIT1'	3	1	1	1	0
	'CHRM2'	3	1	1	1	0
	'CHRM3'	3	1	1	1	0
	'CHRNA1'	3	1	1	1	0
	'CHRNA3'	3	1	1	1	0
	'CHRNA4'	3	1	1	1	0
	'CHRNA5'	3	1	1	1	0
	'CHRNA7'	3	1	1	1	0
	'CHRNB4'	3	1	1	1	0
	'CHUK'	3	1	1	1	0
	'CIP2A'	3	1	1	1	0
	'CKB'	3	1	1	0	1
	'CKMT1B'	3	1	1	1	0
	'CLCA1'	3	1	1	1	0
	'CLEC7A'	3	1	1	1	0
	'CNTN4'	3	1	1	1	0
	'COL11A1'	3	1	1	1	0
	'COL1A1'	3	1	1	1	0
	'COL1A2'	3	1	1	1	0
	'COL6A1'	3	1	1	1	0
	'COMMD10'	3	1	1	1	0
	'COMT'	3	1	1	1	0
	'COX5A'	3	1	1	1	0
	'CP'	3	1	1	1	0
	'CPOX'	3	1	1	1	0
	'CRACR2B'	3	1	1	1	0
	'CREBBP'	3	1	1	1	0
	'CRK'	3	1	1	1	0
	'CRP'	3	1	1	1	0
	'CS'	3	1	1	1	0
	'CSE1L'	3	1	1	1	0
	'CSF2'	3	1	1	1	0
	'CSF3'	3	1	1	1	0
	'CSMD1'	3	1	1	1	0
	'CSTA'	3	1	1	1	0
	'CSTB'	3	1	1	1	0
	'CTH'	3	1	1	1	0
	'CTLA4'	3	1	1	1	0
	'CTNNB1'	3	1	1	1	0
	'CTSD'	3	1	1	1	0
	'CTSE'	3	1	1	1	0
	'CTSG'	3	1	1	1	0
	'CTSL'	3	1	1	1	0
	'CTSS'	3	1	1	1	0
	'CUL4A'	3	1	1	1	0
	'CUTC'	3	1	1	0	1
	'CX3CL1'	3	1	1	1	0
	'CXCL1'	3	1	1	1	0
	'CXCL10'	3	1	1	1	0
	'CXCL11'	3	1	1	1	0
	'CXCL13'	3	1	1	1	0
	'CXCL14'	3	1	1	1	0
	'CXCL16'	3	1	1	1	0
	'CXCL2'	3	1	1	1	0
	'CXCL5'	3	1	1	1	0
	'CXCR1'	3	1	1	1	0
	'CXCR2'	3	1	1	1	0
	'CXCR3'	3	1	1	1	0
	'CXCR6'	3	1	1	1	0
	'CYBA'	3	1	1	1	0
	'CYBB'	3	1	1	1	0
	'CYBC1'	3	1	1	1	0
	'CYP1A1'	3	1	1	1	0
	'CYP1A2'	3	1	1	1	0
	'CYP2A6'	3	1	1	1	0
	'CYP2A7'	3	1	1	1	0
	'CYP2B6'	3	1	1	1	0
	'CYP2E1'	3	1	1	1	0
	'CYP3A5'	3	1	1	1	0
	'CYP7B1'	3	1	1	1	0
	'CYS1'	3	1	1	1	0
	'DBH'	3	1	1	1	0
	'DBP'	3	1	1	1	0
	'DCDC2'	3	1	1	1	0
	'DCN'	3	1	1	1	0
	'DCTN4'	3	1	1	1	0
	'DDIT3'	3	1	1	1	0
	'DDX1'	3	1	1	1	0
	'DDX20'	3	1	1	0	1
	'DDX58'	3	1	1	1	0
	'DECR1'	3	1	1	1	0
	'DEFA1'	3	1	1	1	0
	'DEFB1'	3	1	1	1	0
	'DEFB4A'	3	1	1	1	0
	'DENND2D'	3	1	1	1	0
	'DHCR24'	3	1	1	1	0
	'DIO1'	3	1	1	1	0
	'DIO2'	3	1	1	1	0
	'DIO3'	3	1	1	1	0
	'DIRC3'	3	1	1	1	0
	'DLG2'	3	1	1	1	0
	'DLL1'	3	1	1	1	0
	'DMD'	3	1	1	1	0
	'DMWD'	3	1	1	1	0
	'DNAAF4'	3	1	1	1	0
	'DNAH5'	3	1	1	1	0
	'DNAJC5'	3	1	1	1	0
	'DNASE1'	3	1	1	1	0
	'DNER'	3	1	1	1	0
	'DNM1L'	3	1	1	1	0
	'DOCK1'	3	1	1	1	0
	'DPP4'	3	1	1	1	0
	'DPP6'	3	1	1	1	0
	'DPY30'	3	1	1	0	1
	'DSP'	3	1	1	1	0
	'DUOX1'	3	1	1	1	0
	'DUOX2'	3	1	1	1	0
	'DUSP6'	3	1	1	1	0
	'DVL3'	3	1	1	1	0
	'DYNC2LI1'	3	1	1	0	1
	'ECHS1'	3	1	1	0	1
	'EDN1'	3	1	1	1	0
	'EDNRB'	3	1	1	1	0
	'EEFSEC'	3	1	1	1	0
	'EFCAB5'	3	1	1	1	0
	'EFHC1'	3	1	1	0	1
	'EGF'	3	1	1	1	0
	'EGFR'	3	1	1	1	0
	'EGLN2'	3	1	1	1	0
	'EGR1'	3	1	1	1	0
	'EHMT1'	3	1	1	1	0
	'EIF2AK3'	3	1	1	1	0
	'EIF4EBP1'	3	1	1	1	0
	'ELANE'	3	1	1	1	0
	'ELAVL2'	3	1	1	1	0
	'ELN'	3	1	1	1	0
	'EML4'	3	1	1	1	0
	'EMP2'	3	1	1	0	1
	'ENOSF1'	3	1	1	0	1
	'ENTPD1'	3	1	1	1	0
	'EPAS1'	3	1	1	1	0
	'EPCAM'	3	1	1	0	1
	'EPHB2'	3	1	1	1	0
	'EPHX1'	3	1	1	1	0
	'EPHX2'	3	1	1	1	0
	'EPO'	3	1	1	1	0
	'ERBB3'	3	1	1	1	0
	'ERCC1'	3	1	1	1	0
	'ESR2'	3	1	1	1	0
	'EZR'	3	1	1	1	0
	'F10'	3	1	1	1	0
	'F2R'	3	1	1	1	0
	'F2RL1'	3	1	1	1	0
	'F5'	3	1	1	0	1
	'FABP5'	3	1	1	1	0
	'FAIM2'	3	1	1	1	0
	'FAM13A'	3	1	1	1	0
	'FANCL'	3	1	1	0	1
	'FAS'	3	1	1	1	0
	'FASLG'	3	1	1	1	0
	'FBL'	3	1	1	1	0
	'FBLN1'	3	1	1	1	0
	'FBLN5'	3	1	1	1	0
	'FBXL7'	3	1	1	1	0
	'FBXO32'	3	1	1	1	0
	'FBXO38'	3	1	1	1	0
	'FCGR1A'	3	1	1	1	0
	'FDPS'	3	1	1	1	0
	'FENDRR'	3	1	1	1	0
	'FEV'	3	1	1	1	0
	'FGD6'	3	1	1	1	0
	'FGF10'	3	1	1	1	0
	'FGF13'	3	1	1	1	0
	'FGF2'	3	1	1	1	0
	'FGF23'	3	1	1	1	0
	'FGF7'	3	1	1	1	0
	'FGFR1'	3	1	1	1	0
	'FGFR3'	3	1	1	0	1
	'FGFR4'	3	1	1	1	0
	'FGL1'	3	1	1	1	0
	'FGL2'	3	1	1	1	0
	'FHL1'	3	1	1	1	0
	'FKBP1B'	3	1	1	0	1
	'FKBP5'	3	1	1	1	0
	'FLNA'	3	1	1	1	0
	'FLT1'	3	1	1	1	0
	'FN1'	3	1	1	1	0
	'FOLH1'	3	1	1	1	0
	'FOLR1'	3	1	1	0	1
	'FOS'	3	1	1	1	0
	'FOXA2'	3	1	1	1	0
	'FOXC1'	3	1	1	1	0
	'FOXO1'	3	1	1	1	0
	'FOXO3'	3	1	1	1	0
	'FOXP3'	3	1	1	1	0
	'FPR1'	3	1	1	1	0
	'FPR2'	3	1	1	1	0
	'FTO'	3	1	1	1	0
	'FUNDC1'	3	1	1	1	0
	'FUT8'	3	1	1	1	0
	'FZD4'	3	1	1	1	0
	'GAB2'	3	1	1	1	0
	'GABPA'	3	1	1	1	0
	'GAD1'	3	1	1	1	0
	'GALC'	3	1	1	1	0
	'GALNS'	3	1	1	1	0
	'GALNT13'	3	1	1	1	0
	'GAST'	3	1	1	1	0
	'GATA4'	3	1	1	1	0
	'GC'	3	1	1	1	0
	'GCG'	3	1	1	1	0
	'GCLC'	3	1	1	1	0
	'GCLM'	3	1	1	1	0
	'GDAP1'	3	1	1	1	0
	'GDF11'	3	1	1	1	0
	'GDF15'	3	1	1	1	0
	'GDNF'	3	1	1	1	0
	'GGPS1'	3	1	1	0	1
	'GH1'	3	1	1	1	0
	'GHRL'	3	1	1	1	0
	'GHSR'	3	1	1	1	0
	'GIMAP7'	3	1	1	0	1
	'GLA'	3	1	1	1	0
	'GLB1'	3	1	1	1	0
	'GLIS3'	3	1	1	1	0
	'GLP1R'	3	1	1	1	0
	'GLRX'	3	1	1	1	0
	'GM2A'	3	1	1	1	0
	'GORAB'	3	1	1	0	1
	'GP1BB'	3	1	1	1	0
	'GPC3'	3	1	1	0	1
	'GPR15'	3	1	1	1	0
	'GPR182'	3	1	1	1	0
	'GPR65'	3	1	1	1	0
	'GPRC5A'	3	1	1	1	0
	'GPX1'	3	1	1	1	0
	'GPX3'	3	1	1	1	0
	'GPX4'	3	1	1	1	0
	'GRIK2'	3	1	1	1	0
	'GRIK4'	3	1	1	1	0
	'GSK3B'	3	1	1	1	0
	'GSN'	3	1	1	1	0
	'GSR'	3	1	1	1	0
	'GSS'	3	1	1	1	0
	'GSTCD'	3	1	1	1	0
	'GSTM1'	3	1	1	1	0
	'GSTM2'	3	1	1	1	0
	'GSTO1'	3	1	1	1	0
	'GSTO2'	3	1	1	1	0
	'GSTT1'	3	1	1	1	0
	'GTF2H1'	3	1	1	1	0
	'GTF2I'	3	1	1	1	0
	'GULP1'	3	1	1	1	0
	'GYPA'	3	1	1	1	0
	'GYPB'	3	1	1	1	0
	'GZMA'	3	1	1	1	0
	'GZMB'	3	1	1	1	0
	'H19'	3	1	1	1	0
	'HAMP'	3	1	1	1	0
	'HBEGF'	3	1	1	1	0
	'HCG4B'	3	1	1	1	0
	'HCK'	3	1	1	1	0
	'HCRT'	3	1	1	1	0
	'HDAC1'	3	1	1	0	1
	'HDAC2'	3	1	1	1	0
	'HDAC3'	3	1	1	1	0
	'HDAC4'	3	1	1	1	0
	'HDAC5'	3	1	1	1	0
	'HDAC7'	3	1	1	1	0
	'HDAC9'	3	1	1	1	0
	'HERC1'	3	1	1	1	0
	'HEY1'	3	1	1	1	0
	'HGF'	3	1	1	1	0
	'HHIP'	3	1	1	1	0
	'HIF1A'	3	1	1	1	0
	'HIRA'	3	1	1	1	0
	'HLA-A'	3	1	1	1	0
	'HLA-B'	3	1	1	1	0
	'HLA-DPA1'	3	1	1	1	0
	'HLA-DPB1'	3	1	1	1	0
	'HMGA1'	3	1	1	1	0
	'HMGA2'	3	1	1	1	0
	'HMGB1'	3	1	1	1	0
	'HMOX1'	3	1	1	1	0
	'HNF1A-AS1'	3	1	1	1	0
	'HNRNPD'	3	1	1	1	0
	'HOOK2'	3	1	1	1	0
	'HOXA3'	3	1	1	1	0
	'HOXA4'	3	1	0	1	1
	'HOXA5'	3	1	0	1	1
	'HP'	3	1	1	1	0
	'HPGD'	3	1	1	0	1
	'HPGDS'	3	1	1	1	0
	'HSBP1'	3	1	1	1	0
	'HSD11B1'	3	1	1	1	0
	'HSF2BP'	3	1	1	1	0
	'HSPA1A'	3	1	1	1	0
	'HSPA1B'	3	1	1	1	0
	'HSPA1L'	3	1	1	1	0
	'HSPA4'	3	1	1	1	0
	'HSPB1'	3	1	1	1	0
	'HSPB11'	3	1	1	0	1
	'HSPD1'	3	1	1	1	0
	'HTR2A'	3	1	1	1	0
	'HTR4'	3	1	1	1	0
	'HYAL1'	3	1	1	1	0
	'HYKK'	3	1	1	1	0
	'IAPP'	3	1	1	1	0
	'ICAM1'	3	1	1	1	0
	'IDS'	3	1	1	1	0
	'IFIH1'	3	1	1	1	0
	'IFNA1'	3	1	1	1	0
	'IFNB1'	3	1	1	1	0
	'IFNG'	3	1	1	1	0
	'IGF1'	3	1	1	1	0
	'IGFBP3'	3	1	1	1	0
	'IGFBP7'	3	1	1	1	0
	'IGHE'	3	1	1	1	0
	'IKBKG'	3	1	1	1	0
	'IKZF1'	3	1	1	1	0
	'IL10RA'	3	1	1	1	0
	'IL11'	3	1	1	1	0
	'IL12A'	3	1	1	1	0
	'IL12B'	3	1	1	1	0
	'IL13'	3	1	1	1	0
	'IL13RA1'	3	1	1	1	0
	'IL15'	3	1	1	1	0
	'IL15RA'	3	1	1	1	0
	'IL16'	3	1	1	1	0
	'IL17A'	3	1	1	1	0
	'IL17C'	3	1	1	1	0
	'IL17F'	3	1	1	1	0
	'IL17RA'	3	1	1	1	0
	'IL18'	3	1	1	1	0
	'IL18R1'	3	1	1	1	0
	'IL1A'	3	1	1	1	0
	'IL1R2'	3	1	1	0	1
	'IL1RAP'	3	1	1	1	0
	'IL1RL1'	3	1	1	1	0
	'IL1RN'	3	1	1	1	0
	'IL2'	3	1	1	1	0
	'IL22'	3	1	1	1	0
	'IL23A'	3	1	1	1	0
	'IL23R'	3	1	1	1	0
	'IL27'	3	1	1	1	0
	'IL32'	3	1	1	1	0
	'IL33'	3	1	1	1	0
	'IL37'	3	1	1	1	0
	'IL4'	3	1	1	1	0
	'IL5'	3	1	1	1	0
	'IL5RA'	3	1	1	1	0
	'IL6R'	3	1	1	1	0
	'IL7'	3	1	1	1	0
	'IL9'	3	1	1	1	0
	'INPP5D'	3	1	1	1	0
	'INTS12'	3	1	1	1	0
	'IRAK1'	3	1	1	1	0
	'IREB2'	3	1	1	1	0
	'IRF1-AS1'	3	0	1	1	1
	'IRF3'	3	1	1	1	0
	'IRF4'	3	1	1	0	1
	'IRF7'	3	1	1	1	0
	'ITGA1'	3	1	1	1	0
	'ITGA2B'	3	1	1	1	0
	'ITGA3'	3	1	1	0	1
	'ITGAL'	3	1	1	1	0
	'ITGAM'	3	1	1	1	0
	'ITGAV'	3	1	1	1	0
	'ITGB2'	3	1	1	1	0
	'ITGB3'	3	1	1	1	0
	'ITGB5'	3	1	1	1	0
	'ITGB8'	3	1	1	1	0
	'ITPK1'	3	1	1	1	0
	'JAK1'	3	1	1	1	0
	'JAK3'	3	1	1	1	0
	'JMJD1C'	3	1	1	1	0
	'JPH3'	3	1	1	0	1
	'JUN'	3	1	1	1	0
	'JUNB'	3	1	1	1	0
	'JUP'	3	1	1	0	1
	'KCNG4'	3	1	1	1	0
	'KCNJ2'	3	1	1	1	0
	'KCNJ5'	3	1	1	0	1
	'KCNK1'	3	1	1	1	0
	'KCNK3'	3	1	1	1	0
	'KCNMA1'	3	1	1	1	0
	'KDR'	3	1	1	1	0
	'KEAP1'	3	1	1	1	0
	'KIT'	3	1	1	1	0
	'KL'	3	1	1	1	0
	'KLF15'	3	1	1	1	0
	'KLF2'	3	1	1	1	0
	'KLF5'	3	1	1	1	0
	'KLF6'	3	1	1	1	0
	'KLHL32'	3	1	1	1	0
	'KLHL7'	3	1	1	1	0
	'KLK1'	3	1	1	1	0
	'KLK11'	3	1	1	0	1
	'KLKB1'	3	1	1	1	0
	'KLRK1'	3	1	1	1	0
	'KMT2A'	3	1	1	1	0
	'KNG1'	3	1	1	1	0
	'KRAS'	3	1	1	1	0
	'KRT18'	3	1	1	1	0
	'KRT19'	3	1	1	1	0
	'KRT5'	3	1	1	1	0
	'KRT7'	3	1	1	1	0
	'LAMA1'	3	1	1	1	0
	'LAMA5'	3	1	1	0	1
	'LAMP1'	3	1	1	1	0
	'LBP'	3	1	1	1	0
	'LCN2'	3	1	1	1	0
	'LEP'	3	1	1	1	0
	'LEPR'	3	1	1	1	0
	'LILRB1'	3	1	1	1	0
	'LINC00886'	3	1	1	1	0
	'LINC01006'	3	1	1	1	0
	'LINC01876'	3	1	1	1	0
	'LMNB1'	3	1	1	1	0
	'LMO2'	3	1	1	0	1
	'LOX'	3	1	1	1	0
	'LPO'	3	1	1	1	0
	'LRMDA'	3	1	1	1	0
	'LRP5'	3	1	1	1	0
	'LTA'	3	1	1	1	0
	'LTB'	3	1	1	1	0
	'LTB4R'	3	1	1	1	0
	'LTBP4'	3	1	1	1	0
	'LYSMD4'	3	1	1	1	0
	'MAGI2'	3	1	1	1	0
	'MAML3'	3	1	1	1	0
	'MAP3K19'	3	1	1	1	0
	'MAP3K5'	3	1	1	1	0
	'MAP3K7'	3	1	1	1	0
	'MAPK1'	3	1	1	1	0
	'MAPK13'	3	1	1	1	0
	'MAPK14'	3	1	1	1	0
	'MAPK3'	3	1	1	1	0
	'MAPK7'	3	1	1	1	0
	'MAPK8'	3	1	1	1	0
	'MAPK9'	3	1	1	1	0
	'MARCO'	3	1	1	1	0
	'MAS1'	3	1	1	1	0
	'MAVS'	3	1	1	1	0
	'MBD2'	3	1	1	1	0
	'MBL2'	3	1	1	1	0
	'MBTPS1'	3	1	1	1	0
	'MCAM'	3	1	1	1	0
	'MCL1'	3	1	1	1	0
	'MDK'	3	1	1	1	0
	'MECOM'	3	1	1	1	0
	'MEF2D'	3	1	1	1	0
	'MEFV'	3	1	1	1	0
	'MEG3'	3	1	1	1	0
	'MERTK'	3	1	1	1	0
	'MFAP2'	3	1	1	1	0
	'MFAP4'	3	1	1	1	0
	'MFHAS1'	3	1	1	1	0
	'MFN2'	3	1	1	1	0
	'MGMT'	3	1	1	1	0
	'MGP'	3	1	1	1	0
	'MICAL3'	3	1	1	1	0
	'MIF'	3	1	1	1	0
	'MIP'	3	1	1	1	0
	'MIR106A'	3	1	1	1	0
	'MIR106B'	3	1	1	1	0
	'MIR10A'	3	1	1	1	0
	'MIR125A'	3	1	1	1	0
	'MIR126'	3	1	1	1	0
	'MIR132'	3	1	1	1	0
	'MIR133B'	3	1	1	1	0
	'MIR141'	3	1	1	1	0
	'MIR145'	3	1	1	1	0
	'MIR146A'	3	1	1	1	0
	'MIR146B'	3	1	1	1	0
	'MIR149'	3	1	1	1	0
	'MIR150'	3	1	1	1	0
	'MIR155'	3	1	1	1	0
	'MIR15A'	3	1	1	1	0
	'MIR15B'	3	1	1	1	0
	'MIR181A2'	3	1	1	1	0
	'MIR181C'	3	1	1	1	0
	'MIR186'	3	1	1	1	0
	'MIR190A'	3	1	1	1	0
	'MIR191'	3	1	1	1	0
	'MIR192'	3	1	1	1	0
	'MIR195'	3	1	1	1	0
	'MIR197'	3	1	1	1	0
	'MIR203A'	3	1	1	1	0
	'MIR206'	3	1	1	1	0
	'MIR20A'	3	1	1	1	0
	'MIR21'	3	1	1	1	0
	'MIR210'	3	1	1	1	0
	'MIR212'	3	1	1	1	0
	'MIR214'	3	1	1	1	0
	'MIR218-2'	3	1	1	1	0
	'MIR22'	3	1	1	1	0
	'MIR223'	3	1	1	1	0
	'MIR29B1'	3	1	1	1	0
	'MIR29B2'	3	1	1	1	0
	'MIR29C'	3	1	1	1	0
	'MIR338'	3	1	1	1	0
	'MIR34A'	3	1	1	1	0
	'MIR34C'	3	1	1	1	0
	'MIR424'	3	1	1	1	0
	'MIR483'	3	1	1	1	0
	'MIR503'	3	1	1	1	0
	'MIR570'	3	1	1	1	0
	'MIR664A'	3	1	1	1	0
	'MIR675'	3	1	1	1	0
	'MIR99AHG'	3	1	1	1	0
	'MIRLET7C'	3	1	1	1	0
	'MKS1'	3	1	1	1	0
	'MME'	3	1	1	1	0
	'MMP1'	3	1	1	1	0
	'MMP12'	3	1	1	1	0
	'MMP14'	3	1	1	1	0
	'MMP2'	3	1	1	1	0
	'MMP28'	3	1	0	1	1
	'MMP3'	3	1	1	1	0
	'MMP7'	3	1	1	1	0
	'MMP8'	3	1	1	1	0
	'MMP9'	3	1	1	1	0
	'MMRN1'	3	1	1	1	0
	'MMS22L'	3	1	1	1	0
	'MOK'	3	1	1	1	0
	'MPO'	3	1	1	1	0
	'MRC1'	3	1	1	1	0
	'MSI1'	3	1	1	1	0
	'MSR1'	3	1	1	1	0
	'MSTN'	3	1	1	1	0
	'MSX1'	3	1	1	1	0
	'MTCL1'	3	1	1	1	0
	'MTHFD1'	3	1	1	1	0
	'MTHFD2'	3	1	1	0	1
	'MTOR'	3	1	1	1	0
	'MTRR'	3	1	1	1	0
	'MUC1'	3	1	1	1	0
	'MUC16'	3	1	1	1	0
	'MUC2'	3	1	1	1	0
	'MUC4'	3	1	1	1	0
	'MUC5AC'	3	1	1	1	0
	'MUC5B'	3	1	1	1	0
	'MUC6'	3	1	1	1	0
	'MYC'	3	1	1	1	0
	'MYCN'	3	1	1	1	0
	'MYD88'	3	1	1	1	0
	'MYH7'	3	1	1	1	0
	'MYO1D'	3	1	1	1	0
	'MYOG'	3	1	1	1	0
	'NAT2'	3	1	1	1	0
	'NCF1'	3	1	1	1	0
	'NCF2'	3	1	1	1	0
	'NCF4'	3	1	1	1	0
	'NDN'	3	1	1	0	1
	'NEDD8'	3	1	1	0	1
	'NFE2L2'	3	1	1	1	0
	'NFKB1'	3	1	1	1	0
	'NFU1'	3	1	1	0	1
	'NGF'	3	1	1	1	0
	'NLRP1'	3	1	1	1	0
	'NLRX1'	3	1	1	1	0
	'NME6'	3	1	1	0	1
	'NNMT'	3	1	1	0	1
	'NNT'	3	1	1	1	0
	'NOD1'	3	1	1	1	0
	'NOD2'	3	1	1	1	0
	'NOL4L'	3	1	1	1	0
	'NOS1'	3	1	1	1	0
	'NOS2'	3	1	1	1	0
	'NOS3'	3	1	1	1	0
	'NOTCH1'	3	1	1	1	0
	'NOTCH2'	3	1	1	1	0
	'NOTCH3'	3	1	1	1	0
	'NOX4'	3	1	1	1	0
	'NPNT'	3	1	1	1	0
	'NPPB'	3	1	1	1	0
	'NQO1'	3	1	1	1	0
	'NR1I2'	3	1	1	1	0
	'NR2C2'	3	1	1	1	0
	'NR3C1'	3	1	1	1	0
	'NR3C2'	3	1	1	1	0
	'NR4A1'	3	1	1	1	0
	'NRAS'	3	1	1	1	0
	'NRG1'	3	1	1	1	0
	'NRP1'	3	1	1	1	0
	'NT5DC1'	3	1	1	1	0
	'NT5E'	3	1	1	1	0
	'NTF3'	3	1	1	1	0
	'NTM'	3	1	1	1	0
	'NUDT13'	3	1	1	0	1
	'NUP62'	3	1	1	1	0
	'NWD1'	3	1	1	1	0
	'OAT'	3	1	1	1	0
	'OGG1'	3	1	1	1	0
	'OMP'	3	1	1	1	0
	'OR6F1'	3	1	1	1	0
	'ORAI3'	3	1	1	1	0
	'ORMDL3'	3	1	1	1	0
	'OSM'	3	1	1	0	1
	'P2RX1'	3	1	1	1	0
	'P2RX2'	3	1	1	1	0
	'P2RX3'	3	1	1	1	0
	'P2RX4'	3	1	1	1	0
	'P2RX7'	3	1	1	1	0
	'P2RY1'	3	1	1	1	0
	'P2RY2'	3	1	1	1	0
	'PABPN1'	3	1	1	0	1
	'PAGR1'	3	1	1	1	0
	'PAH'	3	1	1	1	0
	'PAK2'	3	1	1	1	0
	'PARK7'	3	1	1	1	0
	'PARP1'	3	1	1	1	0
	'PARP6'	3	1	1	0	1
	'PCDH15'	3	1	1	1	0
	'PCDH9'	3	1	1	1	0
	'PCM1'	3	1	1	1	0
	'PCNA'	3	1	1	1	0
	'PDCD1'	3	1	1	1	0
	'PDE4A'	3	1	1	1	0
	'PDE4B'	3	1	1	1	0
	'PDE4D'	3	1	1	1	0
	'PDE7A'	3	1	1	1	0
	'PDGFRB'	3	1	1	1	0
	'PDSS2'	3	1	1	1	0
	'PDZD2'	3	1	1	1	0
	'PECAM1'	3	1	1	1	0
	'PGAM5'	3	1	1	1	0
	'PGF'	3	1	1	1	0
	'PGM1'	3	1	1	0	1
	'PI3'	3	1	1	1	0
	'PID1'	3	1	1	1	0
	'PIGR'	3	1	1	1	0
	'PIK3CA'	3	1	1	1	0
	'PIK3CB'	3	1	1	1	0
	'PIK3CD'	3	1	1	1	0
	'PIK3CG'	3	1	1	1	0
	'PIM1'	3	1	1	1	0
	'PIM3'	3	1	1	1	0
	'PINK1'	3	1	1	1	0
	'PITPNA'	3	1	1	1	0
	'PKD2L1'	3	1	1	1	0
	'PKN2'	3	1	1	1	0
	'PLA2G10'	3	1	1	1	0
	'PLA2G1B'	3	1	0	1	1
	'PLA2G2A'	3	1	1	1	0
	'PLA2G2D'	3	1	1	1	0
	'PLAT'	3	1	1	1	0
	'PLAU'	3	1	1	1	0
	'PLAUR'	3	1	1	1	0
	'PLB1'	3	1	1	1	0
	'PLCE1'	3	1	1	1	0
	'PLRG1'	3	1	1	0	1
	'PLXNA4'	3	1	1	1	0
	'POFUT1'	3	1	1	1	0
	'PON1'	3	1	1	1	0
	'POSTN'	3	1	1	1	0
	'PPARA'	3	1	1	1	0
	'PPARG'	3	1	1	1	0
	'PPARGC1A'	3	1	1	1	0
	'PPIA'	3	1	1	1	0
	'PPIEL'	3	1	1	1	0
	'PPIG'	3	1	1	1	0
	'PPP1R15A'	3	1	1	1	0
	'PPP4R4'	3	1	1	1	0
	'PRDM1'	3	1	1	0	1
	'PRDX5'	3	1	1	0	1
	'PRKAG2'	3	1	1	1	0
	'PRKCB'	3	1	1	1	0
	'PRKCD'	3	1	1	1	0
	'PRKCZ'	3	1	1	1	0
	'PRKN'	3	1	1	1	0
	'PRMT6'	3	1	1	0	1
	'PRR15L'	3	1	1	0	1
	'PRTN3'	3	1	1	1	0
	'PSMA5'	3	1	1	0	1
	'PSORS1C1'	3	1	1	1	0
	'PTAFR'	3	1	1	1	0
	'PTCH1'	3	1	1	1	0
	'PTEN'	3	1	1	1	0
	'PTGDS'	3	1	1	1	0
	'PTGS1'	3	1	1	1	0
	'PTGS2'	3	1	1	1	0
	'PTH'	3	1	1	1	0
	'PTPA'	3	1	1	1	0
	'PTPN1'	3	1	1	1	0
	'PTPN22'	3	1	1	1	0
	'PTPN6'	3	1	1	1	0
	'PTPRC'	3	1	1	1	0
	'PVT1'	3	1	1	1	0
	'RAB4B'	3	1	1	1	0
	'RAD51C'	3	1	1	0	1
	'RAPGEF3'	3	1	1	1	0
	'RARB'	3	1	1	1	0
	'RARRES2'	3	1	1	1	0
	'RBM8A'	3	1	1	1	0
	'RBMS3'	3	1	1	1	0
	'REG3A'	3	1	1	1	0
	'RELA'	3	1	1	1	0
	'REN'	3	1	1	1	0
	'RERE'	3	1	1	1	0
	'RFFL'	3	1	1	0	1
	'RHOA'	3	1	1	1	0
	'RHOD'	3	1	1	1	0
	'RIPK2'	3	1	1	1	0
	'RIT1'	3	1	1	1	0
	'RNASE3'	3	1	1	1	0
	'RNASEH2A'	3	1	1	1	0
	'RNF150'	3	1	1	1	0
	'RNF220'	3	1	1	1	0
	'RNF5'	3	1	1	1	0
	'RNPEP'	3	1	1	1	0
	'ROBO2'	3	1	1	1	0
	'ROMO1'	3	1	1	1	0
	'RORA'	3	1	1	1	0
	'RORC'	3	1	1	1	0
	'ROS1'	3	1	1	1	0
	'RPGR'	3	1	1	1	0
	'RPS6KA5'	3	1	1	1	0
	'RREB1'	3	1	1	1	0
	'RSAD2'	3	1	1	1	0
	'RSPH6A'	3	1	1	1	0
	'RSRC1'	3	1	1	1	0
	'S100A12'	3	1	1	0	1
	'S100A8'	3	1	1	1	0
	'S100A9'	3	1	1	1	0
	'S1PR2'	3	1	1	1	0
	'S1PR5'	3	1	1	1	0
	'SAA1'	3	1	1	1	0
	'SATB1'	3	1	1	1	0
	'SCARB1'	3	1	1	1	0
	'SCFD2'	3	1	1	1	0
	'SCGB1A1'	3	1	1	1	0
	'SCLT1'	3	1	1	1	0
	'SDC1'	3	1	1	0	1
	'SDHA'	3	1	1	0	1
	'SDHB'	3	1	1	1	0
	'SEC24C'	3	1	1	1	0
	'SELL'	3	1	1	1	0
	'SELP'	3	1	1	1	0
	'SEMA6A'	3	1	1	1	0
	'SERPINA1'	3	1	1	1	0
	'SERPINA3'	3	1	1	1	0
	'SERPINA7'	3	1	1	1	0
	'SERPINE2'	3	1	1	1	0
	'SERPING1'	3	1	1	1	0
	'SESN1'	3	1	1	0	1
	'SESN2'	3	1	1	1	0
	'SETD2'	3	1	1	1	0
	'SFRP2'	3	1	1	1	0
	'SFRP5'	3	1	1	1	0
	'SFTPA1'	3	1	1	1	0
	'SFTPA2'	3	1	1	1	0
	'SFTPB'	3	1	1	1	0
	'SFTPC'	3	1	1	1	0
	'SGCA'	3	1	1	1	0
	'SGCD'	3	1	1	1	0
	'SGF29'	3	1	1	1	0
	'SGSH'	3	1	1	1	0
	'SH2B1'	3	1	1	1	0
	'SH2D1A'	3	1	1	1	0
	'SIGLEC9'	3	1	1	1	0
	'SIRT1'	3	1	1	1	0
	'SIRT2'	3	1	1	1	0
	'SIRT3'	3	1	1	1	0
	'SIRT6'	3	1	1	1	0
	'SLC11A1'	3	1	1	1	0
	'SLC16A4'	3	1	1	1	0
	'SLC1A5'	3	1	1	1	0
	'SLC1A7'	3	1	1	1	0
	'SLC22A12'	3	1	1	1	0
	'SLC26A4'	3	1	1	1	0
	'SLC2A1'	3	1	1	1	0
	'SLC2A4'	3	1	1	1	0
	'SLC30A10'	3	1	1	1	0
	'SLC35A1'	3	1	1	0	1
	'SLC35F3'	3	1	1	1	0
	'SLC52A2'	3	1	1	1	0
	'SLC6A2'	3	1	1	1	0
	'SLC6A4'	3	1	1	1	0
	'SLC7A11'	3	1	1	0	1
	'SLC7A8'	3	1	1	0	1
	'SLIT2'	3	1	1	1	0
	'SLMAP'	3	1	1	1	0
	'SLPI'	3	1	1	1	0
	'SMAD2'	3	1	1	1	0
	'SMAD3'	3	1	1	1	0
	'SMAD4'	3	1	1	1	0
	'SMAD6'	3	1	1	1	0
	'SMAD7'	3	1	1	1	0
	'SMPD1'	3	1	1	1	0
	'SNHG5'	3	1	1	1	0
	'SNTG2'	3	1	1	1	0
	'SOCS5'	3	1	1	1	0
	'SOD1'	3	1	1	1	0
	'SOD2'	3	1	1	1	0
	'SOD3'	3	1	1	1	0
	'SOX5'	3	1	1	1	0
	'SOX9'	3	1	1	1	0
	'SP1'	3	1	1	1	0
	'SP3'	3	1	1	1	0
	'SPAG16'	3	1	1	1	0
	'SPAM1'	3	1	1	1	0
	'SPARC'	3	1	1	1	0
	'SPDEF'	3	1	1	1	0
	'SPHK1'	3	1	1	1	0
	'SPINT1'	3	1	1	1	0
	'SPINT2'	3	1	1	0	1
	'SQSTM1'	3	1	1	1	0
	'SRA1'	3	1	1	1	0
	'SRC'	3	1	1	1	0
	'SRF'	3	1	1	1	0
	'SRR'	3	1	1	1	0
	'STAR'	3	1	1	1	0
	'STAT1'	3	1	1	1	0
	'STAT3'	3	1	1	1	0
	'STAT4'	3	1	1	1	0
	'STAT5A'	3	1	1	1	0
	'STAT5B'	3	1	1	1	0
	'STAT6'	3	1	1	1	0
	'STC2'	3	1	0	1	1
	'STN1'	3	1	1	1	0
	'STS'	3	1	1	1	0
	'STUB1'	3	1	1	0	1
	'SULT1A1'	3	1	1	0	1
	'SUMF1'	3	1	1	1	0
	'SUV39H1'	3	1	1	1	0
	'SUZ12P1'	3	1	1	1	0
	'SYCP2L'	3	1	1	1	0
	'SYN3'	3	1	1	1	0
	'SYNPO2L'	3	1	1	1	0
	'SYT1'	3	1	1	1	0
	'TAC1'	3	1	1	1	0
	'TACR2'	3	1	1	1	0
	'TACSTD2'	3	1	1	1	0
	'TAF1'	3	1	1	1	0
	'TAFA2'	3	1	1	1	0
	'TAZ'	3	1	1	1	0
	'TBK1'	3	1	1	1	0
	'TBX1'	3	1	1	1	0
	'TBX2'	3	1	1	0	1
	'TBX4'	3	1	1	1	0
	'TCF4'	3	1	1	1	0
	'TERT'	3	1	1	1	0
	'TESK2'	3	1	1	1	0
	'TET2'	3	1	1	1	0
	'TFAM'	3	1	1	1	0
	'TFEB'	3	1	1	1	0
	'TFPI'	3	1	1	1	0
	'TGFB1'	3	1	1	1	0
	'TGFB2'	3	1	1	1	0
	'TGFB3'	3	1	1	1	0
	'TGFBR3'	3	1	1	1	0
	'THBS1'	3	1	1	0	1
	'THRA'	3	1	1	1	0
	'THSD4'	3	1	1	1	0
	'TIMP1'	3	1	1	1	0
	'TIMP2'	3	1	1	1	0
	'TIMP4'	3	1	1	1	0
	'TLR2'	3	1	1	1	0
	'TLR3'	3	1	1	1	0
	'TLR4'	3	1	1	1	0
	'TLR6'	3	1	1	1	0
	'TLR7'	3	1	1	1	0
	'TLR8'	3	1	1	1	0
	'TLR9'	3	1	1	1	0
	'TM9SF4'	3	1	1	1	0
	'TMEM254'	3	1	1	1	0
	'TNC'	3	1	1	1	0
	'TNF'	3	1	1	1	0
	'TNFRSF10C'	3	1	0	1	1
	'TNFRSF11B'	3	1	1	1	0
	'TNFRSF1A'	3	1	1	1	0
	'TNFRSF1B'	3	1	1	1	0
	'TNFRSF4'	3	1	1	1	0
	'TNFRSF8'	3	1	1	1	0
	'TNNC1'	3	1	1	0	1
	'TNNI3'	3	1	1	1	0
	'TNNT1'	3	1	1	1	0
	'TNNT2'	3	1	1	1	0
	'TNPO1'	3	1	1	1	0
	'TNRC6A'	3	1	1	1	0
	'TNS1'	3	1	1	1	0
	'TNXB'	3	1	1	1	0
	'TOP2B'	3	1	1	1	0
	'TOX2'	3	1	1	1	0
	'TP53'	3	1	1	1	0
	'TP53BP1'	3	1	1	1	0
	'TPP1'	3	1	1	1	0
	'TPSAB1'	3	1	1	0	1
	'TPT1'	3	1	1	1	0
	'TREM1'	3	1	1	1	0
	'TREM2'	3	1	1	1	0
	'TRIM63'	3	1	1	1	0
	'TRPC1'	3	1	1	1	0
	'TRPC3'	3	1	1	1	0
	'TRPC6'	3	1	1	1	0
	'TRPM8'	3	1	1	1	0
	'TRPV1'	3	1	1	1	0
	'TRPV2'	3	1	1	1	0
	'TRPV4'	3	1	1	1	0
	'TSHZ3'	3	1	1	1	0
	'TSLP'	3	1	1	1	0
	'TSPAN14'	3	1	1	1	0
	'TSPO'	3	1	1	1	0
	'TUG1'	3	1	1	1	0
	'TULP3'	3	1	1	1	0
	'TWIST1'	3	1	1	1	0
	'TXN'	3	1	1	1	0
	'UBR3'	3	1	1	1	0
	'UCA1'	3	1	1	1	0
	'UCN3'	3	1	1	1	0
	'UFD1'	3	1	1	1	0
	'UGCG'	3	1	1	1	0
	'USP24'	3	1	1	1	0
	'VAMP8'	3	1	1	0	1
	'VCAN'	3	1	1	1	0
	'VCP'	3	1	1	1	0
	'VDR'	3	1	1	1	0
	'VEGFA'	3	1	1	1	0
	'VGLL4'	3	1	1	1	0
	'VIM'	3	1	1	1	0
	'VIP'	3	1	1	1	0
	'VIPR1'	3	1	1	1	0
	'VTN'	3	1	1	1	0
	'VWF'	3	1	1	1	0
	'WAS'	3	1	1	1	0
	'WASF1'	3	1	1	1	0
	'WASF2'	3	1	1	1	0
	'WDR20'	3	1	1	1	0
	'WDR5'	3	1	1	1	0
	'WIPF1'	3	1	1	1	0
	'WNK1'	3	1	1	1	0
	'WNT1'	3	1	1	1	0
	'WNT3A'	3	1	1	1	0
	'WNT4'	3	1	1	1	0
	'WNT5A'	3	1	1	1	0
	'WT1'	3	1	1	0	1
	'XDH'	3	1	1	1	0
	'XRCC1'	3	1	1	1	0
	'XRCC5'	3	1	1	1	0
	'YBX1'	3	1	1	1	0
	'YTHDC1'	3	1	1	1	0
	'YWHAZ'	3	1	1	1	0
	'YY1'	3	1	1	1	0
	'YY1AP1'	3	1	1	1	0
	'ZBTB38'	3	1	1	1	0
	'ZDHHC18'	3	1	1	1	0
	'ZFP36'	3	1	1	1	0
	'ZFPM2'	3	1	1	1	0
	'ZFYVE21'	3	1	1	0	1
	'ZKSCAN1'	3	1	1	1	0
	'ZNF700'	3	1	1	0	1
	'ZNF780A'	3	1	1	0	1
	'A2ML1'	2	1	1	0	0
	'A4GALT'	2	1	1	0	0
	'AARS1'	2	1	1	0	0
	'AARS2'	2	1	1	0	0
	'ABCA13'	2	1	1	0	0
	'ABCA3'	2	1	1	0	0
	'ABCA5'	2	1	1	0	0
	'ABCA6'	2	1	1	0	0
	'ABCA7'	2	1	1	0	0
	'ABCB11'	2	1	1	0	0
	'ABCB4'	2	1	1	0	0
	'ABCB6'	2	1	0	1	0
	'ABCB7'	2	1	1	0	0
	'ABCC2'	2	1	1	0	0
	'ABCC4'	2	1	1	0	0
	'ABCC6'	2	1	1	0	0
	'ABCC8'	2	1	1	0	0
	'ABCC9'	2	1	1	0	0
	'ABCE1'	2	1	1	0	0
	'ABCF1'	2	1	1	0	0
	'ABCF2'	2	1	1	0	0
	'ABCG1'	2	1	1	0	0
	'ABCG2'	2	1	1	0	0
	'ABCG5'	2	1	1	0	0
	'ABCG8'	2	1	1	0	0
	'ABHD12B'	2	1	1	0	0
	'ABHD16A'	2	1	1	0	0
	'ABI3BP'	2	1	1	0	0
	'ABL1'	2	1	1	0	0
	'ABL2'	2	1	0	0	1
	'ABLIM3'	2	1	1	0	0
	'ABO'	2	1	1	0	0
	'ABRAXAS2'	2	1	1	0	0
	'ACACA'	2	1	1	0	0
	'ACACB'	2	1	1	0	0
	'ACAD9'	2	1	1	0	0
	'ACADL'	2	1	1	0	0
	'ACADM'	2	1	1	0	0
	'ACADS'	2	1	1	0	0
	'ACAN'	2	1	1	0	0
	'ACAT1'	2	1	0	0	1
	'ACCS'	2	1	0	1	0
	'ACD'	2	1	1	0	0
	'ACE2'	2	1	1	0	0
	'ACIN1'	2	1	1	0	0
	'ACKR1'	2	1	1	0	0
	'ACKR2'	2	1	1	0	0
	'ACLY'	2	1	0	1	0
	'ACO1'	2	1	1	0	0
	'ACOT7'	2	1	0	1	0
	'ACP1'	2	1	1	0	0
	'ACP5'	2	1	1	0	0
	'ACR'	2	1	1	0	0
	'ACSBG1'	2	1	1	0	0
	'ACSS2'	2	1	0	1	0
	'ACTA1'	2	1	1	0	0
	'ACTA2'	2	1	1	0	0
	'ACTBL2'	2	1	0	1	0
	'ACTC1'	2	1	1	0	0
	'ACTN1'	2	1	1	0	0
	'ACTN2'	2	1	1	0	0
	'ACTN3'	2	1	1	0	0
	'ACTN4'	2	1	1	0	0
	'ACTR2'	2	1	1	0	0
	'ACTR3'	2	1	1	0	0
	'ACVR1'	2	1	1	0	0
	'ACVR1B'	2	1	1	0	0
	'ACVR2B'	2	1	1	0	0
	'ACVRL1'	2	1	1	0	0
	'ACYP1'	2	1	0	0	1
	'ACYP2'	2	1	1	0	0
	'ADA2'	2	1	1	0	0
	'ADAM10'	2	1	1	0	0
	'ADAM12'	2	1	1	0	0
	'ADAM23'	2	1	1	0	0
	'ADAMTS1'	2	1	1	0	0
	'ADAMTS10'	2	1	1	0	0
	'ADAMTS17'	2	1	1	0	0
	'ADAMTS19'	2	1	0	1	0
	'ADAMTS3'	2	1	1	0	0
	'ADAMTS5'	2	1	1	0	0
	'ADAMTS6'	2	1	1	0	0
	'ADAMTS7'	2	1	1	0	0
	'ADAMTSL1'	2	1	1	0	0
	'ADAR'	2	1	1	0	0
	'ADARB1'	2	1	1	0	0
	'ADARB2'	2	1	1	0	0
	'ADAT3'	2	1	1	0	0
	'ADCY1'	2	1	1	0	0
	'ADCY10'	2	1	1	0	0
	'ADCY3'	2	1	1	0	0
	'ADCY6'	2	1	1	0	0
	'ADCY8'	2	1	1	0	0
	'ADCY9'	2	1	1	0	0
	'ADCYAP1'	2	1	1	0	0
	'ADCYAP1R1'	2	1	1	0	0
	'ADGRE2'	2	1	0	0	1
	'ADGRE5'	2	1	1	0	0
	'ADGRG1'	2	1	1	0	0
	'ADGRL2'	2	1	1	0	0
	'ADGRL3'	2	1	1	0	0
	'ADH1C'	2	1	1	0	0
	'ADH5'	2	1	1	0	0
	'ADI1'	2	1	1	0	0
	'ADIRF'	2	1	1	0	0
	'ADK'	2	1	1	0	0
	'ADNP'	2	1	1	0	0
	'ADO'	2	1	0	1	0
	'ADORA1'	2	1	1	0	0
	'ADPRH'	2	1	1	0	0
	'ADRA1A'	2	1	1	0	0
	'ADRA1B'	2	1	1	0	0
	'ADRA1D'	2	1	1	0	0
	'ADRA2A'	2	1	1	0	0
	'ADRA2B'	2	1	1	0	0
	'ADRA2C'	2	1	1	0	0
	'ADRB3'	2	1	1	0	0
	'ADSS2'	2	1	1	0	0
	'AEBP1'	2	1	0	1	0
	'AEBP2'	2	1	1	0	0
	'AEN'	2	1	0	0	1
	'AFAP1'	2	1	1	0	0
	'AFAP1-AS1'	2	1	1	0	0
	'AFF2'	2	1	1	0	0
	'AFF4'	2	1	1	0	0
	'AFG1L'	2	1	1	0	0
	'AFP'	2	1	1	0	0
	'AGA'	2	1	1	0	0
	'AGAP1'	2	1	1	0	0
	'AGAP5'	2	1	1	0	0
	'AGBL4'	2	1	1	0	0
	'AGGF1'	2	1	1	0	0
	'AGK'	2	1	1	0	0
	'AGL'	2	1	1	0	0
	'AGO2'	2	1	1	0	0
	'AGPAT2'	2	1	1	0	0
	'AGPAT3'	2	1	0	1	0
	'AGRN'	2	1	1	0	0
	'AGRP'	2	1	1	0	0
	'AGTR2'	2	1	1	0	0
	'AHI1'	2	1	1	0	0
	'AHNAK'	2	1	1	0	0
	'AHRR'	2	1	1	0	0
	'AHSA1'	2	1	0	1	0
	'AHSP'	2	1	1	0	0
	'AICDA'	2	1	1	0	0
	'AIF1'	2	1	1	0	0
	'AIFM1'	2	1	1	0	0
	'AIFM3'	2	1	1	0	0
	'AIMP1'	2	1	1	0	0
	'AIP'	2	1	1	0	0
	'AIRE'	2	1	1	0	0
	'AK1'	2	1	1	0	0
	'AK2'	2	1	1	0	0
	'AK7'	2	1	1	0	0
	'AKAP13'	2	1	1	0	0
	'AKAP3'	2	1	1	0	0
	'AKAP9'	2	1	1	0	0
	'AKR1A1'	2	1	1	0	0
	'AKR1B1'	2	1	1	0	0
	'AKR1C3'	2	1	1	0	0
	'AKR1C4'	2	1	1	0	0
	'AKT2'	2	1	1	0	0
	'AKT3'	2	1	1	0	0
	'AKTIP'	2	1	0	0	1
	'ALAD'	2	1	1	0	0
	'ALDH18A1'	2	1	1	0	0
	'ALDH1A2'	2	1	1	0	0
	'ALDH1B1'	2	1	1	0	0
	'ALDH1L1'	2	1	1	0	0
	'ALDH7A1'	2	1	1	0	0
	'ALDOA'	2	1	1	0	0
	'ALG10'	2	1	1	0	0
	'ALG11'	2	1	1	0	0
	'ALG12'	2	1	1	0	0
	'ALG2'	2	1	1	0	0
	'ALG3'	2	1	1	0	0
	'ALG8'	2	1	1	0	0
	'ALKBH2'	2	1	1	0	0
	'ALLC'	2	1	1	0	0
	'ALMS1'	2	1	1	0	0
	'ALMS1P1'	2	1	1	0	0
	'ALOX12'	2	1	1	0	0
	'ALOX5'	2	1	1	0	0
	'ALOX5AP'	2	1	1	0	0
	'ALPL'	2	1	1	0	0
	'ALX3'	2	1	1	0	0
	'ALYREF'	2	1	1	0	0
	'AMACR'	2	1	1	0	0
	'AMBP'	2	1	1	0	0
	'AMD1P3'	2	0	1	1	0
	'AMER1'	2	1	1	0	0
	'AMFR'	2	1	0	1	0
	'AMH'	2	1	1	0	0
	'AMIGO2'	2	1	0	0	1
	'AMMECR1'	2	1	1	0	0
	'AMPD1'	2	1	1	0	0
	'AMT'	2	1	1	0	0
	'ANAPC10'	2	1	1	0	0
	'ANAPC4'	2	1	0	0	1
	'ANAPC5'	2	1	1	0	0
	'ANG'	2	1	1	0	0
	'ANGPTL2'	2	1	1	0	0
	'ANGPTL4'	2	1	1	0	0
	'ANGPTL6'	2	1	1	0	0
	'ANK1'	2	1	1	0	0
	'ANK2'	2	1	1	0	0
	'ANK3'	2	1	1	0	0
	'ANKFN1'	2	1	1	0	0
	'ANKRA2'	2	1	1	0	0
	'ANKRD1'	2	1	1	0	0
	'ANKRD2'	2	1	1	0	0
	'ANKRD29'	2	1	0	0	1
	'ANKRD44'	2	1	1	0	0
	'ANKRD46'	2	1	0	0	1
	'ANKRD7'	2	1	1	0	0
	'ANKS3'	2	1	1	0	0
	'ANKS6'	2	1	1	0	0
	'ANLN'	2	1	1	0	0
	'ANP32C'	2	1	1	0	0
	'ANTXR1'	2	1	1	0	0
	'ANTXR2'	2	1	1	0	0
	'ANXA2'	2	1	1	0	0
	'ANXA2P3'	2	1	1	0	0
	'ANXA2R'	2	1	1	0	0
	'ANXA6'	2	1	1	0	0
	'AOAH'	2	1	1	0	0
	'AOC1'	2	1	1	0	0
	'AP1B1'	2	1	1	0	0
	'AP1S1'	2	1	1	0	0
	'AP2A2'	2	1	1	0	0
	'AP2B1'	2	1	1	0	0
	'AP3M1'	2	1	1	0	0
	'AP5S1'	2	1	1	0	0
	'APAF1'	2	1	1	0	0
	'APC'	2	1	1	0	0
	'APC2'	2	1	1	0	0
	'APCS'	2	1	0	1	0
	'APELA'	2	1	1	0	0
	'APEX2'	2	1	1	0	0
	'API5'	2	1	1	0	0
	'APIP'	2	1	1	0	0
	'APLN'	2	1	1	0	0
	'APOA2'	2	1	1	0	0
	'APOA4'	2	1	1	0	0
	'APOA5'	2	1	1	0	0
	'APOB'	2	1	1	0	0
	'APOBEC3G'	2	1	1	0	0
	'APOE'	2	1	1	0	0
	'APOH'	2	1	1	0	0
	'APOL1'	2	1	1	0	0
	'APPL1'	2	1	1	0	0
	'APRT'	2	1	1	0	0
	'APTX'	2	1	1	0	0
	'AQP1'	2	1	1	0	0
	'AQP2'	2	1	1	0	0
	'AQP8'	2	1	1	0	0
	'AQR'	2	1	1	0	0
	'AR'	2	1	1	0	0
	'ARF4'	2	1	1	0	0
	'ARFGEF3'	2	1	0	1	0
	'ARFRP1'	2	1	1	0	0
	'ARG1'	2	1	1	0	0
	'ARG2'	2	1	1	0	0
	'ARHGAP12'	2	1	0	1	0
	'ARHGAP24'	2	1	1	0	0
	'ARHGAP31'	2	1	1	0	0
	'ARHGAP32'	2	1	1	0	0
	'ARHGAP5'	2	1	1	0	0
	'ARHGDIA'	2	1	1	0	0
	'ARHGDIB'	2	1	1	0	0
	'ARHGEF17'	2	1	1	0	0
	'ARHGEF2'	2	1	1	0	0
	'ARHGEF37'	2	1	1	0	0
	'ARHGEF7'	2	1	0	1	0
	'ARID1A'	2	1	1	0	0
	'ARID1B'	2	1	1	0	0
	'ARL13A'	2	1	1	0	0
	'ARL13B'	2	1	1	0	0
	'ARL3'	2	1	1	0	0
	'ARL4A'	2	1	1	0	0
	'ARL6'	2	1	1	0	0
	'ARMC9'	2	1	1	0	0
	'ARNT'	2	1	1	0	0
	'ARNT2'	2	1	1	0	0
	'ARNTL'	2	1	1	0	0
	'ARPC2'	2	1	1	0	0
	'ARRB1'	2	1	1	0	0
	'ARRB2'	2	1	1	0	0
	'ARRDC1'	2	1	1	0	0
	'ARSD'	2	1	1	0	0
	'ARSG'	2	1	1	0	0
	'ARSK'	2	1	1	0	0
	'ARSL'	2	1	1	0	0
	'ARX'	2	1	1	0	0
	'ASAH1'	2	1	1	0	0
	'ASAH2'	2	1	1	0	0
	'ASB1'	2	1	1	0	0
	'ASB10'	2	1	1	0	0
	'ASB8'	2	1	1	0	0
	'ASCC1'	2	1	0	1	0
	'ASCL1'	2	1	1	0	0
	'ASCL3'	2	1	1	0	0
	'ASF1A'	2	1	0	0	1
	'ASH1L'	2	1	1	0	0
	'ASH2L'	2	1	1	0	0
	'ASIC1'	2	1	1	0	0
	'ASIC2'	2	1	1	0	0
	'ASL'	2	1	1	0	0
	'ASNSD1'	2	1	0	0	1
	'ASRGL1'	2	1	1	0	0
	'ASS1'	2	1	1	0	0
	'ASXL3'	2	1	1	0	0
	'ATAD1'	2	1	1	0	0
	'ATE1'	2	1	1	0	0
	'ATF6'	2	1	1	0	0
	'ATF6B'	2	1	1	0	0
	'ATG4B'	2	1	1	0	0
	'ATG5'	2	1	1	0	0
	'ATM'	2	1	1	0	0
	'ATOH7'	2	1	1	0	0
	'ATOX1'	2	1	1	0	0
	'ATP10B'	2	1	1	0	0
	'ATP10D'	2	1	1	0	0
	'ATP11A'	2	1	1	0	0
	'ATP12A'	2	1	1	0	0
	'ATP13A2'	2	1	1	0	0
	'ATP13A3'	2	1	1	0	0
	'ATP1A1'	2	1	1	0	0
	'ATP1A2'	2	1	1	0	0
	'ATP1B2'	2	1	1	0	0
	'ATP2A1'	2	1	1	0	0
	'ATP2B2'	2	1	1	0	0
	'ATP4A'	2	1	1	0	0
	'ATP6V0A2'	2	1	1	0	0
	'ATP6V1H'	2	1	1	0	0
	'ATP7A'	2	1	1	0	0
	'ATP7B'	2	1	1	0	0
	'ATP8B1'	2	1	1	0	0
	'ATP8B2'	2	1	1	0	0
	'ATP8B3'	2	1	1	0	0
	'ATP8B4'	2	1	1	0	0
	'ATR'	2	1	1	0	0
	'ATRNL1'	2	1	1	0	0
	'ATRX'	2	1	1	0	0
	'ATXN10'	2	1	1	0	0
	'ATXN7'	2	1	1	0	0
	'AUH'	2	1	1	0	0
	'AURKA'	2	1	1	0	0
	'AVEN'	2	1	1	0	0
	'AVP'	2	1	1	0	0
	'AVPR1A'	2	1	0	0	1
	'AXIN1'	2	1	1	0	0
	'AXIN2'	2	1	1	0	0
	'AXL'	2	1	1	0	0
	'AZGP1'	2	1	0	1	0
	'AZIN2'	2	1	0	1	0
	'AZU1'	2	0	1	1	0
	'B2M'	2	1	1	0	0
	'B3GALT6'	2	1	1	0	0
	'B3GAT1'	2	1	1	0	0
	'B3GLCT'	2	1	1	0	0
	'B3GNT2'	2	1	1	0	0
	'B4GALNT2'	2	1	1	0	0
	'B4GALNT4'	2	1	1	0	0
	'B4GALT7'	2	1	1	0	0
	'B9D1'	2	1	1	0	0
	'B9D2'	2	1	1	0	0
	'BACE1'	2	1	1	0	0
	'BACH1'	2	1	1	0	0
	'BAD'	2	1	1	0	0
	'BAG3'	2	1	1	0	0
	'BAIAP2'	2	1	1	0	0
	'BAK1'	2	1	1	0	0
	'BANF1'	2	1	1	0	0
	'BANP'	2	1	1	0	0
	'BAP1'	2	1	1	0	0
	'BARD1'	2	1	1	0	0
	'BARHL2'	2	1	1	0	0
	'BAZ1A'	2	1	1	0	0
	'BAZ1B'	2	1	1	0	0
	'BAZ2B'	2	1	1	0	0
	'BBIP1'	2	1	1	0	0
	'BBS1'	2	1	1	0	0
	'BBS10'	2	1	1	0	0
	'BBS12'	2	1	1	0	0
	'BBS2'	2	1	1	0	0
	'BBS4'	2	1	1	0	0
	'BBS5'	2	1	1	0	0
	'BBS7'	2	1	1	0	0
	'BCAR1'	2	1	1	0	0
	'BCL10'	2	1	1	0	0
	'BCL2A1'	2	1	1	0	0
	'BCL2L1'	2	1	1	0	0
	'BCL2L11'	2	1	1	0	0
	'BCL2L2'	2	1	1	0	0
	'BCL6'	2	1	1	0	0
	'BCL7B'	2	1	1	0	0
	'BCOR'	2	1	1	0	0
	'BCR'	2	1	1	0	0
	'BCS1L'	2	1	1	0	0
	'BDH2'	2	1	0	0	1
	'BDKRB1'	2	1	1	0	0
	'BDKRB2'	2	1	1	0	0
	'BEST1'	2	1	0	1	0
	'BEST2'	2	1	1	0	0
	'BET1L'	2	1	1	0	0
	'BEX3'	2	1	0	0	1
	'BEX4'	2	1	0	0	1
	'BFAR'	2	1	1	0	0
	'BFSP2'	2	1	1	0	0
	'BGLAP'	2	1	1	0	0
	'BGN'	2	1	1	0	0
	'BHMT'	2	1	1	0	0
	'BHMT2'	2	1	1	0	0
	'BICD2'	2	1	1	0	0
	'BIRC2'	2	1	1	0	0
	'BIRC3'	2	1	1	0	0
	'BIRC5'	2	1	1	0	0
	'BLCAP'	2	1	0	0	1
	'BLK'	2	1	1	0	0
	'BLM'	2	1	1	0	0
	'BLOC1S1'	2	1	1	0	0
	'BLVRA'	2	1	1	0	0
	'BLVRB'	2	1	1	0	0
	'BLZF1'	2	1	1	0	0
	'BMF'	2	1	0	1	0
	'BMI1'	2	1	1	0	0
	'BMP1'	2	1	1	0	0
	'BMP2'	2	1	1	0	0
	'BMP7'	2	1	1	0	0
	'BMPER'	2	1	1	0	0
	'BMPR1B'	2	1	1	0	0
	'BNIP3L'	2	1	1	0	0
	'BOLA1'	2	1	0	0	1
	'BOLA3'	2	1	1	0	0
	'BRAF'	2	1	1	0	0
	'BRCA1'	2	1	1	0	0
	'BRCA2'	2	1	1	0	0
	'BRD2'	2	1	1	0	0
	'BRD3'	2	1	1	0	0
	'BRDT'	2	1	1	0	0
	'BRF1'	2	1	1	0	0
	'BRIP1'	2	1	1	0	0
	'BRK1'	2	1	1	0	0
	'BRPF3'	2	1	0	0	1
	'BRS3'	2	1	1	0	0
	'BRWD3'	2	1	1	0	0
	'BSCL2'	2	1	1	0	0
	'BST1'	2	1	1	0	0
	'BTAF1'	2	1	0	1	0
	'BTBD16'	2	1	1	0	0
	'BTBD8'	2	1	0	1	0
	'BTD'	2	1	1	0	0
	'BTF3P11'	2	1	0	1	0
	'BTG3'	2	1	1	0	0
	'BTK'	2	1	1	0	0
	'BTNL2'	2	1	1	0	0
	'BTRC'	2	1	1	0	0
	'BUB1'	2	1	1	0	0
	'BUB1B'	2	1	1	0	0
	'C1D'	2	1	1	0	0
	'C1GALT1C1'	2	1	0	0	1
	'C1QBP'	2	1	1	0	0
	'C1QTNF2'	2	1	0	0	1
	'C1S'	2	1	1	0	0
	'C1orf185'	2	0	1	1	0
	'C2CD3'	2	1	1	0	0
	'C3'	2	1	1	0	0
	'C4B'	2	1	1	0	0
	'C4BPA'	2	1	1	0	0
	'C5'	2	1	1	0	0
	'C7'	2	1	1	0	0
	'CA3'	2	1	1	0	0
	'CA4'	2	1	1	0	0
	'CA9'	2	1	1	0	0
	'CABIN1'	2	1	1	0	0
	'CACNA1B'	2	1	1	0	0
	'CACNA1C'	2	1	1	0	0
	'CACNA1D'	2	1	1	0	0
	'CACNA1E'	2	1	1	0	0
	'CACNA1F'	2	1	1	0	0
	'CACNA1G'	2	1	1	0	0
	'CACNA1H'	2	1	1	0	0
	'CACNA1S'	2	1	1	0	0
	'CACNA2D1'	2	1	1	0	0
	'CACNA2D3'	2	1	1	0	0
	'CACNB1'	2	1	1	0	0
	'CACNB2'	2	1	1	0	0
	'CACNG2'	2	1	1	0	0
	'CACNG3'	2	1	1	0	0
	'CAD'	2	1	0	1	0
	'CADM1'	2	1	1	0	0
	'CADM2'	2	1	1	0	0
	'CALB2'	2	1	1	0	0
	'CALD1'	2	1	1	0	0
	'CALN1'	2	1	1	0	0
	'CAMK1'	2	1	1	0	0
	'CAMK2G'	2	1	1	0	0
	'CANT1'	2	1	1	0	0
	'CANX'	2	1	1	0	0
	'CAPN1'	2	1	1	0	0
	'CAPNS1'	2	1	1	0	0
	'CAPRIN1'	2	1	1	0	0
	'CAPRIN2'	2	1	1	0	0
	'CAPZB'	2	1	1	0	0
	'CARD10'	2	1	1	0	0
	'CARD11'	2	1	1	0	0
	'CARD9'	2	1	1	0	0
	'CARM1'	2	1	0	1	0
	'CARMN'	2	1	1	0	0
	'CARTPT'	2	1	1	0	0
	'CASC2'	2	1	1	0	0
	'CASC3'	2	1	1	0	0
	'CASK'	2	1	1	0	0
	'CASP10'	2	1	1	0	0
	'CASP12'	2	1	0	1	0
	'CASP2'	2	1	1	0	0
	'CASP5'	2	1	1	0	0
	'CASP6'	2	1	1	0	0
	'CASP7'	2	1	1	0	0
	'CASP9'	2	1	1	0	0
	'CASQ2'	2	1	1	0	0
	'CASR'	2	1	1	0	0
	'CASS4'	2	1	1	0	0
	'CAST'	2	1	1	0	0
	'CATSPER1'	2	1	1	0	0
	'CATSPERB'	2	1	1	0	0
	'CAV3'	2	1	1	0	0
	'CAVIN1'	2	1	1	0	0
	'CBARP'	2	1	1	0	0
	'CBL'	2	1	1	0	0
	'CBLIF'	2	1	1	0	0
	'CBLN1'	2	1	1	0	0
	'CBR1'	2	1	1	0	0
	'CBR3'	2	1	1	0	0
	'CBSL'	2	0	1	1	0
	'CBX3'	2	1	0	0	1
	'CBX5'	2	1	1	0	0
	'CBY1'	2	1	1	0	0
	'CC2D2A'	2	1	1	0	0
	'CCAT1'	2	1	1	0	0
	'CCBE1'	2	1	1	0	0
	'CCDC103'	2	1	1	0	0
	'CCDC12'	2	1	0	0	1
	'CCDC122'	2	1	1	0	0
	'CCDC130'	2	1	1	0	0
	'CCDC171'	2	1	1	0	0
	'CCDC184'	2	1	1	0	0
	'CCDC22'	2	1	1	0	0
	'CCDC28A'	2	1	0	0	1
	'CCDC39'	2	1	1	0	0
	'CCDC40'	2	1	1	0	0
	'CCDC63'	2	1	1	0	0
	'CCDC65'	2	1	1	0	0
	'CCDC78'	2	1	1	0	0
	'CCDC86'	2	1	1	0	0
	'CCDC92'	2	1	0	0	1
	'CCDC97'	2	1	1	0	0
	'CCHCR1'	2	1	1	0	0
	'CCK'	2	1	1	0	0
	'CCKBR'	2	1	1	0	0
	'CCL17'	2	1	1	0	0
	'CCL19'	2	1	1	0	0
	'CCL21'	2	1	1	0	0
	'CCL25'	2	1	1	0	0
	'CCL26'	2	1	1	0	0
	'CCL27'	2	1	1	0	0
	'CCL4'	2	1	1	0	0
	'CCL7'	2	1	1	0	0
	'CCM2'	2	1	1	0	0
	'CCN3'	2	1	1	0	0
	'CCNA1'	2	1	1	0	0
	'CCNA2'	2	1	1	0	0
	'CCNB1'	2	1	1	0	0
	'CCNB1IP1'	2	1	0	0	1
	'CCNC'	2	1	1	0	0
	'CCND2'	2	1	1	0	0
	'CCND3'	2	1	1	0	0
	'CCNH'	2	1	1	0	0
	'CCNL1'	2	1	1	0	0
	'CCNO'	2	1	1	0	0
	'CCNT1'	2	1	1	0	0
	'CCP110'	2	1	1	0	0
	'CCR1'	2	1	1	0	0
	'CCR4'	2	1	1	0	0
	'CCS'	2	1	1	0	0
	'CCT3'	2	1	1	0	0
	'CCT8L2'	2	1	1	0	0
	'CD151'	2	1	1	0	0
	'CD160'	2	1	1	0	0
	'CD19'	2	1	1	0	0
	'CD2'	2	1	1	0	0
	'CD200R1'	2	1	0	1	0
	'CD209'	2	1	1	0	0
	'CD22'	2	1	1	0	0
	'CD226'	2	1	1	0	0
	'CD24'	2	1	1	0	0
	'CD247'	2	1	1	0	0
	'CD248'	2	1	1	0	0
	'CD27'	2	1	1	0	0
	'CD2AP'	2	1	1	0	0
	'CD36'	2	1	1	0	0
	'CD4'	2	1	1	0	0
	'CD40LG'	2	1	1	0	0
	'CD44'	2	1	1	0	0
	'CD46'	2	1	0	1	0
	'CD47'	2	1	0	1	0
	'CD5'	2	1	1	0	0
	'CD52'	2	1	1	0	0
	'CD53'	2	1	1	0	0
	'CD55'	2	1	1	0	0
	'CD58'	2	1	1	0	0
	'CD59'	2	1	1	0	0
	'CD5L'	2	1	0	1	0
	'CD7'	2	1	1	0	0
	'CD79A'	2	1	1	0	0
	'CD82'	2	1	1	0	0
	'CD9'	2	1	1	0	0
	'CD93'	2	1	1	0	0
	'CD99'	2	1	1	0	0
	'CDAN1'	2	1	1	0	0
	'CDC16'	2	1	0	0	1
	'CDC20'	2	1	1	0	0
	'CDC25A'	2	1	1	0	0
	'CDC25B'	2	1	1	0	0
	'CDC25C'	2	1	1	0	0
	'CDC42'	2	1	1	0	0
	'CDC42EP3'	2	1	1	0	0
	'CDC45'	2	1	1	0	0
	'CDC5L'	2	1	1	0	0
	'CDC73'	2	1	1	0	0
	'CDCA7L'	2	1	1	0	0
	'CDH1'	2	1	1	0	0
	'CDH15'	2	1	1	0	0
	'CDH2'	2	1	1	0	0
	'CDH20'	2	1	1	0	0
	'CDH23'	2	1	1	0	0
	'CDH5'	2	1	1	0	0
	'CDH6'	2	1	1	0	0
	'CDH7'	2	1	1	0	0
	'CDHR3'	2	1	1	0	0
	'CDIN1'	2	1	1	0	0
	'CDIPT'	2	1	1	0	0
	'CDK1'	2	1	1	0	0
	'CDK12'	2	1	1	0	0
	'CDK13'	2	1	1	0	0
	'CDK19'	2	1	1	0	0
	'CDK2'	2	1	1	0	0
	'CDK20'	2	1	1	0	0
	'CDK4'	2	1	1	0	0
	'CDK5'	2	1	1	0	0
	'CDK5RAP1'	2	1	1	0	0
	'CDK5RAP3'	2	1	1	0	0
	'CDK8'	2	1	1	0	0
	'CDK9'	2	1	1	0	0
	'CDKN1A'	2	1	1	0	0
	'CDKN2AIP'	2	1	0	0	1
	'CDKN2B'	2	1	1	0	0
	'CDKN2C'	2	1	1	0	0
	'CDKN3'	2	1	1	0	0
	'CDON'	2	1	1	0	0
	'CDRT15P1'	2	0	1	1	0
	'CDRT4'	2	1	1	0	0
	'CDT1'	2	1	1	0	0
	'CDX1'	2	1	1	0	0
	'CEACAM1'	2	1	1	0	0
	'CEACAM3'	2	1	1	0	0
	'CEACAM6'	2	1	1	0	0
	'CEACAM7'	2	1	1	0	0
	'CEBPA'	2	1	1	0	0
	'CEBPB'	2	1	1	0	0
	'CEBPD'	2	1	1	0	0
	'CEL'	2	1	0	1	0
	'CELA1'	2	1	1	0	0
	'CELF6'	2	1	1	0	0
	'CENATAC'	2	1	0	0	1
	'CENPB'	2	1	1	0	0
	'CENPF'	2	1	1	0	0
	'CENPJ'	2	1	0	1	0
	'CEP104'	2	1	1	0	0
	'CEP120'	2	1	1	0	0
	'CEP152'	2	1	1	0	0
	'CEP164'	2	1	1	0	0
	'CEP290'	2	1	1	0	0
	'CEP41'	2	1	1	0	0
	'CEP55'	2	1	1	0	0
	'CEP83'	2	1	1	0	0
	'CEP85L'	2	1	1	0	0
	'CEP89'	2	1	1	0	0
	'CEPT1'	2	1	1	0	0
	'CER1'	2	1	1	0	0
	'CERS1'	2	1	1	0	0
	'CERS2'	2	1	1	0	0
	'CES1'	2	1	1	0	0
	'CETP'	2	1	1	0	0
	'CFAP100'	2	1	0	1	0
	'CFAP161'	2	1	1	0	0
	'CFAP20'	2	1	1	0	0
	'CFAP251'	2	1	1	0	0
	'CFAP298'	2	1	1	0	0
	'CFAP300'	2	1	1	0	0
	'CFAP43'	2	1	1	0	0
	'CFAP44'	2	1	1	0	0
	'CFAP47'	2	1	1	0	0
	'CFAP52'	2	1	1	0	0
	'CFAP53'	2	1	1	0	0
	'CFAP54'	2	1	1	0	0
	'CFAP58'	2	1	1	0	0
	'CFAP65'	2	1	1	0	0
	'CFAP69'	2	1	1	0	0
	'CFAP70'	2	1	1	0	0
	'CFAP97'	2	1	0	1	0
	'CFC1'	2	1	1	0	0
	'CFD'	2	1	1	0	0
	'CFHR1'	2	1	0	1	0
	'CFHR2'	2	1	1	0	0
	'CFI'	2	1	1	0	0
	'CFL1'	2	1	1	0	0
	'CFP'	2	1	1	0	0
	'CGA'	2	1	1	0	0
	'CGB3'	2	1	1	0	0
	'CH25H'	2	1	0	1	0
	'CHAF1A'	2	1	1	0	0
	'CHAT'	2	1	1	0	0
	'CHCHD1'	2	1	1	0	0
	'CHD1'	2	1	1	0	0
	'CHD3'	2	1	1	0	0
	'CHD4'	2	1	1	0	0
	'CHD6'	2	1	1	0	0
	'CHD7'	2	1	1	0	0
	'CHD8'	2	1	1	0	0
	'CHD9'	2	1	1	0	0
	'CHEK1'	2	1	1	0	0
	'CHEK2'	2	1	1	0	0
	'CHERP'	2	1	0	1	0
	'CHGA'	2	1	1	0	0
	'CHGB'	2	1	1	0	0
	'CHI3L2'	2	1	1	0	0
	'CHIA'	2	1	1	0	0
	'CHID1'	2	1	1	0	0
	'CHKA'	2	1	1	0	0
	'CHN1'	2	1	0	0	1
	'CHRFAM7A'	2	1	1	0	0
	'CHRM1'	2	1	1	0	0
	'CHRM3-AS2'	2	0	1	1	0
	'CHRM5'	2	1	1	0	0
	'CHRNA10'	2	1	1	0	0
	'CHRNA2'	2	1	1	0	0
	'CHRNA6'	2	1	1	0	0
	'CHRNB1'	2	1	1	0	0
	'CHRNB3'	2	1	1	0	0
	'CHRND'	2	1	1	0	0
	'CHRNE'	2	1	1	0	0
	'CHRNG'	2	1	1	0	0
	'CHST6'	2	1	1	0	0
	'CIB2'	2	1	0	1	0
	'CIITA'	2	1	1	0	0
	'CINP'	2	1	1	0	0
	'CISH'	2	1	1	0	0
	'CITED2'	2	1	1	0	0
	'CKAP5'	2	1	1	0	0
	'CKM'	2	1	1	0	0
	'CKS1B'	2	1	1	0	0
	'CLASP1'	2	1	1	0	0
	'CLASRP'	2	1	1	0	0
	'CLCA2'	2	1	1	0	0
	'CLCA4'	2	1	1	0	0
	'CLCN2'	2	1	1	0	0
	'CLCN3'	2	1	1	0	0
	'CLCN4'	2	1	1	0	0
	'CLCN5'	2	1	1	0	0
	'CLCN7'	2	1	1	0	0
	'CLDN1'	2	1	1	0	0
	'CLDN23'	2	1	1	0	0
	'CLDN4'	2	1	1	0	0
	'CLDN5'	2	1	0	1	0
	'CLDN6'	2	1	1	0	0
	'CLEC11A'	2	1	1	0	0
	'CLEC1A'	2	1	1	0	0
	'CLEC4A'	2	1	1	0	0
	'CLEC4D'	2	1	0	0	1
	'CLEC4F'	2	1	1	0	0
	'CLIP2'	2	1	1	0	0
	'CLIP3'	2	1	1	0	0
	'CLK2'	2	1	0	0	1
	'CLN3'	2	1	1	0	0
	'CLN6'	2	1	1	0	0
	'CLNK'	2	1	1	0	0
	'CLNS1A'	2	1	0	0	1
	'CLPTM1L'	2	1	1	0	0
	'CLSTN2'	2	1	1	0	0
	'CLTC'	2	1	1	0	0
	'CLTCL1'	2	1	1	0	0
	'CLTRN'	2	1	1	0	0
	'CLU'	2	1	1	0	0
	'CMA1'	2	1	1	0	0
	'CMKLR1'	2	1	1	0	0
	'CNBP'	2	1	0	0	1
	'CNIH1'	2	1	1	0	0
	'CNIH2'	2	1	1	0	0
	'CNIH3'	2	1	1	0	0
	'CNMD'	2	1	1	0	0
	'CNN1'	2	1	1	0	0
	'CNNM3'	2	1	1	0	0
	'CNP'	2	1	1	0	0
	'CNR1'	2	1	1	0	0
	'CNR2'	2	1	0	1	0
	'CNTD1'	2	1	1	0	0
	'CNTF'	2	1	1	0	0
	'CNTLN'	2	1	1	0	0
	'CNTN5'	2	1	1	0	0
	'CNTNAP2'	2	1	1	0	0
	'COA3'	2	1	1	0	0
	'COA5'	2	1	0	0	1
	'COBL'	2	1	1	0	0
	'COG2'	2	1	1	0	0
	'COG3'	2	1	0	0	1
[truncated: 26,261 more rows]
